# Supplementary material for: The Virome of Babaco (Vasconcellea × heilbornii) Expands to Include New Members of the Rhabdoviridae and Bromoviridae
Source: MDPI journal article supplement (doi:10.3390/v15061380), 2023-06-16
Supplement: s1 [file s1]

**Supplementary Table S3.** Nucleotide (nt) and amino acid (aa) identities between open reading frames (ORFs) and their predicted products of babaco ilarvirus-1 (BabIV-1) and counterparts from all ilarviruses currently available at NCBI.

| <i>Iilarviruses</i>                        | <b>RNA 1</b><br>nt | <b>ORF 1a</b><br>nt(aa) | <b>RNA 2</b><br>nt | <b>ORF2a</b><br>nt(aa) | <b>RNA 3</b><br>nt | <b>ORF3a</b><br>nt(aa) | <b>ORF3b</b><br>nt(aa) |
|--------------------------------------------|--------------------|-------------------------|--------------------|------------------------|--------------------|------------------------|------------------------|
| <b>Subgroup 1</b>                          |                    |                         |                    |                        |                    |                        |                        |
| <i>Ageratum latent virus</i>               | 39,88              | 43,19 (51,26)           | 36,29              | 40,08 (43,56)          | 21,78              | 33,84 (33,11)          | 28,27 (26,77)          |
| <i>Parietaria mottle virus</i>             | 40,42              | 42,34 (51,49)           | 36,86              | 39,56 (44,03)          | 21,74              | 31,32 (33,11)          | 28,80 (25,75)          |
| <i>Tobacco streak virus</i>                | 40,77              | 42,83 (50,72)           | 36,62              | 39,00 (44,42)          | 22,51              | 31,86 (32,67)          | 29,21 (28,40)          |
| <i>Privet ringspot virus</i>               | 39,79              | 42,24 (50,32)           | 36,86              | 39,72 (44,14)          | 21,82              | 32,45 (35,31)          | 28,32 (25,00)          |
| <i>Strawberry necrotic shock virus</i>     | 39,43              | 42,31 (50,63)           | 37,14              | 39,38 (44,55)          | 22,90              | 31,97 (33,99)          | 27,99 (30,33)          |
| <i>Blackberry chlorotic ringspot virus</i> | 39,69              | 42,22 (50,32)           | 36,25              | 38,82 (44,20)          | 23,70              | 32,91 (33,99)          | 30,16 (28,19)          |
| <i>Average (% identity)</i>                | 40,00              | 42,52 (50,79)           | 36,67              | 39,43 (44,15)          | 22,41              | 32,39 (33,70)          | 28,79 (27,41)          |
| <b>Subgroup 2</b>                          |                    |                         |                    |                        |                    |                        |                        |
| <i>Tulare apple mosaic virus</i>           | 39,85              | 42,82 (48,80)           | 33,48              | 36,45 (40,35)          | 21,90              | 32,55 (34,90)          | 29,63 (27,04)          |
| <i>Citrus leaf rugose virus</i>            | 39,67              | 42,97 (52,00)           | 34,29              | 37,02 (40,35)          | 20,26              | 32,67 (33,67)          | 31,28 (25,42)          |
| <i>Spinach latent virus</i>                | 39,49              | 43,35 (49,22)           | 34,45              | 39,48 (40,53)          | 23,79              | 31,65 (34,34)          | 33,29 (29,44)          |
| <i>Elm mottle virus</i>                    | 40,21              | 43,46 (50,00)           | 33,59              | 38,19 (42,15)          | 23,42              | 32,87 (33,89)          | 30,47 (27,83)          |
| <i>Asparagus virus 2</i>                   | 40,28              | 42,93 (50,55)           | 33,78              | 38,06 (41,37)          | 23,78              | 32,65 (33,89)          | 30,13 (28,57)          |
| <i>Citrus variegation virus</i>            | 40,67              | 43,36 (50,55)           | 34,36              | 39,46 (41,70)          | 21,48              | 33,02 (31,31)          | 31,30 (29,00)          |
| <i>Tomato necrotic streak virus</i>        | 39,93              | 43,53 (51,77)           | 33,08              | 36,54 (39,03)          | 22,25              | 31,99 (34,23)          | 30,25 (28,33)          |
| <i>Average (% identity)</i>                | 40,01              | 43,20 (50,41)           | 33,86              | 37,89 (40,78)          | 22,41              | 32,49 (33,75)          | 30,91 (27,95)          |
| <b>Subgroup 3</b>                          |                    |                         |                    |                        |                    |                        |                        |
| <i>Apple mosaic virus</i>                  | 57,20              | 53,72 (73,96)           | 49,62              | 49,02 (65,63)          | 40,28              | 48,71 (71,33)          | 48,71 (61,61)          |
| <i>Apple necrotic mosaic virus</i>         | 58,83              | 53,60 (74,46)           | 51,16              | 49,62 (71,98)          | 41,78              | 46,69 (72,79)          | 50,28 (70,00)          |
| <i>Blueberry shock virus</i>               | 57,15              | 53,57 (74,53)           | 50,04              | 51,37 (66,16)          | 41,51              | 50,60 (73,58)          | 50,20 (68,56)          |
| <i>Prunus necrotic ringspot virus</i>      | 58,94              | 54,19 (76,05)           | 50,95              | 52,86 (67,73)          | 48,14              | 51,53 (73,61)          | 52,00 (68,72)          |
| <i>Lilac leaf chlorosis virus</i>          | 58,97              | 53,86 (78,24)           | 49,55              | 49,03 (64,97)          | 44,93              | 52,99 (81,79)          | 49,65 (72,85)          |
| <i>Average (% identity)</i>                | 58,22              | 53,79 (75,45)           | 50,26              | 50,38 (67,29)          | 43,33              | 50,10 (74,62)          | 50,17 (68,35)          |
| <b>Subgroup 4</b>                          |                    |                         |                    |                        |                    |                        |                        |
| <i>Fragaria chiloensis latent virus</i>    | 41,80              | 44,58 (56,80)           | 39,05              | 38,54 (50,35)          | 31,50              | 35,19 (38,92)          | 36,15 (42,17)          |
| <i>Prune dwarf virus</i>                   | 41,85              | 45,90 (58,95)           | 40,51              | 42,15 (49,94)          | 23,28              | 38,34 (42,38)          | 32,32 (32,43)          |
| <i>Average (% identity)</i>                | 41,83              | 45,24 (57,88)           | 39,78              | 40,35 (50,15)          | 27,39              | 36,77 (40,65)          | 34,24 (37,30)          |
| <b>Unclassified</b>                        |                    |                         |                    |                        |                    |                        |                        |
| <i>Humulus japonicus latent virus</i>      | 41,91              | 44,95 (57,16)           | 36,39              | 36,52 (42,93)          | 17,84              | 35,32 (40,33)          | 28,63 (29,96)          |
| <i>American plum line pattern virus</i>    | 39,39              | 42,66 (51,15)           | 37,24              | 36,08 (43,17)          | 31,48              | 30,82 (35,53)          | 34,34 (39,64)          |
| <i>Average (% identity)</i>                | 40,65              | 43,81 (54,16)           | 36,82              | 36,30 (43,05)          | 24,66              | 33,07 (37,93)          | 31,49 (34,80)          |
