# Supplementary material for: The Virome of Babaco (Vasconcellea × heilbornii) Expands to Include New Members of the Rhabdoviridae and Bromoviridae
Source: MDPI journal article supplement (doi:10.3390/v15061380), 2023-06-16
Supplement: s1 [file s1]

**Supplementary Table S4.** List of ilarviruses used in phylogenetic analyses.

| Name                                    | Acronym | Replicase P1a  | RdRp P2a       | MP             | CP             |
|-----------------------------------------|---------|----------------|----------------|----------------|----------------|
| Ageratum latent virus                   | AgLV    | YP_008470969.1 | YP_008470970.1 | YP_008470972.1 | YP_008470973.1 |
| American plum line pattern virus        | APLPV   | NP_602312.1    | NP_602313.1    | NP_602314.1    | NP_602315.1    |
| Apple mosaic virus                      | ApMV    | NP_604469.1    | NP_604470.1    | NP_604484.1    | NP_604485.1    |
| Apple necrotic mosaic virus             | ApNMV   | YP_009551612.1 | YP_009551615.1 | YP_009551613.1 | YP_009551614.1 |
| Asparagus virus 2                       | AV2     | YP_002455928.1 | YP_002455929.1 | YP_002455926.1 | YP_002455927.1 |
| Babaco ilarvirus 1                      | BabIV-1 | OQ256238       | OQ256239       | OQ256240       | OQ256240       |
| Blackberry chlorotic ringspot virus     | BCRV    | YP_002308569.1 | YP_002308570.1 | YP_002308572.1 | YP_002308573.1 |
| Blueberry shock virus                   | BlShV   | YP_008519304.1 | YP_008519305.1 | YP_008519306.1 | YP_008519307.1 |
| Cape gooseberry ilarvirus 1             | CGIV-1  | YP_009551515.1 | YP_009551513.1 | YP_009551516.1 | YP_009551517.1 |
| Citrus leaf rugose virus                | CiLRV   | NP_613282.1    | NP_613281.1    | NP_613279.1    | NP_613280.1    |
| Cucumber mosaic virus                   | CMV     | NP_049323.1    | NP_049324.1    | NP_040776.1    | NP_040777.1    |
| Citrus variegation virus                | CVV     | YP_001285482.1 | YP_001285483.1 | YP_001285480.1 | YP_001285481.1 |
| Elm mottle virus                        | EMoV    | NP_619576.1    | NP_619575.1    | NP_619577.1    | NP_619578.1    |
| Fragaria chiloensis latent virus        | FCILV   | YP_164801.1    | YP_164802.1    | YP_164804.1    | YP_164805.1    |
| Grapevine associated ilarvirus          | GAIV    | QIJ25693.1     | QIJ25694.1     | QIJ25696.1     | QIJ25697.1     |
| Humulus japonicus latent virus          | HJLV    | YP_054422.1    | YP_054423.1    | YP_054424.1    | YP_054425.1    |
| Lilac leaf chlorosis virus              | LLCV    | YP_009104367.1 | YP_009104368.1 | YP_009104372.1 | YP_009104373.1 |
| Prune dwarf virus                       | PDV     | YP_611154.1    | YP_611151.1    | YP_611152.1    | YP_611153.1    |
| Parietaria mottle virus                 | PMoV    | YP_006446.1    | YP_006447.1    | YP_006463.1    | YP_006464.1    |
| Prunus necrotic ringspot virus          | PNRSV   | NP_733823.1    | NP_733824.1    | NP_733825.1    | NP_733826.1    |
| Privet ringspot virus                   | PrRSV   | YP_009165996.1 | YP_009165997.1 | YP_009165999.1 | YP_009166000.1 |
| Prunus virus I                          | PrV-1   | QSG73629.1     | QSG73630.1     | QSG73632.1     | QSG73633.1     |
| Peanut virus C                          | PVC     | AWC08303.1     | AWC08304.1     | AWC08306.1     | AWC08307.1     |
| Potato yellowing virus                  | PYV     | QGL51777.1     | QGL51778.1     | QGL51779.1     | QGL51780.1     |
| Rosa ilarvirus-1                        | RIV-1   | QPB74030.1     | QPB74031.1     | QPB74033.1     | QPB74034.1     |
| Solanum nigrum ilarvirus 1              | SNIV-1  | QGN75791.1     | QGN75794.1     | QGN75799.1     | QGN75800.1     |
| Strawberry necrotic shock virus         | SNSV    | YP_941474.2    | YP_941472.1    | YP_941470.1    | YP_941471.1    |
| Spinach latent virus                    | SpLV    | NP_620677.1    | NP_620678.1    | NP_620680.1    | NP_620681.1    |
| Tulare apple mosaic virus               | TAMV    | NP_620753.1    | NP_620754.1    | NP_620756.1    | NP_620757.1    |
| Tomato aspermy virus                    | TAV     | NP_620760.1    | NP_620761.1    | NP_620758.1    | NP_620759.1    |
| Tomato necrotic spot virus              | TNSV    | AYN45099.1     | AYN45100.1     | AYN45102.1     | AYN45103.1     |
| Tomato necrotic streak virus            | ToNSV   | YP_009508872.1 | YP_009508870.1 | YP_009508873.1 | YP_009508874.1 |
| Tea plant line pattern virus            | TPLPV   | YP_009551567.1 | YP_009551568.1 | YP_009551569.1 | YP_009551570.1 |
| Tobacco streak virus                    | TSV     | NP_620772.1    | NP_620768.1    | NP_620773.1    | NP_620774.1    |
| Viola white distortion associated virus | VWDAV   | ANS71064.1     | ANS71063.1     | ANS71062.1     | ANS71061.1     |
| Water chestnut virus A                  | WCVA    | UCY33659.1     | UCY33660.1     | UCY33661.1     | UCY33662.1     |
