# Supplementary material for: The Virome of Babaco (Vasconcellea × heilbornii) Expands to Include New Members of the Rhabdoviridae and Bromoviridae
Source: MDPI journal article supplement (doi:10.3390/v15061380), 2023-06-16
Supplement: s1 [file s1]

**Supplementary Table S5.** List of rhabdoviruses used in phylogenetic analyses.

| <b>Virus name</b>                             | <b>Abbreviation</b> | <b>Accession</b> |
|-----------------------------------------------|---------------------|------------------|
| Alfalfa associated nucleorhabdovirus          | AaNV                | UBX89820.1       |
| Artemisia capillaris nucleorhabdovirus 1      | AcNRV1              | UKL15221.1       |
| Alfalfa dwarf virus                           | ADV                 | YP009177021.1    |
| Alopecurus myosuroides varicosavirus 1        | AMVV1               | LN713933         |
| Apple rootstock virus A                       | ApRVA               | QBZ28538.1       |
| Agave tequilana virus 1                       | ATV1                | DAF42283.1       |
| Babaco rhabdovirus 1                          | BabRV-1             | OQ256237         |
| Black currant nucleorhabdovirus 1             | BCaRV               | AUW36419.1       |
| Barley yellow striate mosaic virus            | BYSMV               | KM213865         |
| Colocasia bobone disease-associated virus     | CBDaV               | KT381973         |
| Cereal chlorotic mottle virus isolate M       | CCMoV               | MW731536         |
| Cardamom vein clearing nucleorhabdovirus 1    | CdVCV               | QJZ27984.1       |
| Citrus chlorotic spot virus                   | CiCSV               | QBK95541.1       |
| Citrus leprosis virus N                       | CiLV-N              | AQN78378.1       |
| Clerodendrum chlorotic spot virus             | CiCSV               | AWT62671.1       |
| Cnidium virus 1                               | CnV1                | UGY70985.1       |
| Coffee ringspot virus                         | CoRSV               | KF812526         |
| Datura yellow vein nucleorhabdovirus          | DYVV                | AKH61406.1       |
| Eggplant mottled dwarf alphanucleorhabdovirus | EMDV                | QYA72338.1       |
| Green sichuan pepper nucleorhabdovirus        | GSPNuV              | AZN18347.1       |
| Joa yellow blotch-associated virus            | JYBaV               | QUI75406.1       |
| Lettuce big-vein virus                        | LBVV                | AB075039         |
| Lettuce necrotic yellows virus                | LNyV                | YP425092.1       |
| Maize fine streak virus                       | MFSV                | AY618417         |
| Maize iranian mosaic nucleorhabdovirus        | MIMV                | ABA60889.1       |
| Morogoro maize-associated virus               | MMaV                | YP010087201.1    |
| Maize mosaic nucleorhabdovirus                | MMV                 | QCS90262.1       |
| Maize yellow striate virus                    | MYSV                | KY884303         |
| Northern cereal mosaic virus                  | NCMV                | AB030277         |
| Orchid fleck dichorhavirus                    | OFV                 | QDM58727.1       |
| Peach virus 1                                 | PeV1                | QIQ60850.1       |
| Persimmon virus A                             | PeVA                | AB735628         |
| Physostegia chlorotic mottle virus            | PhCMoV              | QUJ09420.1       |
| Papaya virus E                                | PpVE                | MH282832         |
| Potato yellow dwarf virus                     | PYDV                | ARJ54297.1       |
| Red clover varicosavirus                      | RCaVV               | MF918568         |
| Rice stripe mosaic virus                      | RSMV                | KX525586         |
| Rice yellow stunt virus                       | RYSV                | AB011257         |
| Strawberry crinkle cytorhabdovirus            | SCV                 | MH129615         |
| Sonchus yellow net nucleorhabdovirus          | SYNV                | NP042286.1       |
| Sowthistle yellow vein virus                  | SYVV                | QJQ80127.1       |
| Taro vein chlorosis virus                     | TaVCV               | YP224083.1       |
| Tomato yellow mottle-associated virus         | TYMaV               | KY075646         |
| Vesicular stomatitis Indiana virus            | VSIV                | NP_041716.1      |
| Wheat yellow striate virus                    | WYSV                | YP010086818.1    |
| Yerba mate virus A                            | YmVA                | QID92311.1       |
