# Supplementary material for: The Virome of Babaco (Vasconcellea × heilbornii) Expands to Include New Members of the Rhabdoviridae and Bromoviridae
Source: MDPI journal article supplement (doi:10.3390/v15061380), 2023-06-16
Supplement: s1 [file s1]

**Supplementary Table S2.** List of primers used in this study for genome amplification and detection of babacovirus 1 (BabIV-1) and babacov rhabdovirus 1 (BabRV-1).

| Virus   | Primer name   | Sequence 5' to 3'         | Target genome*<br>position<br>(amplicon size nt) |
|---------|---------------|---------------------------|--------------------------------------------------|
| BabIV-1 | 1Race-5'end-1 | CGTTGCTAAAGCATCATGATCC    | 1-56                                             |
|         | 1Race-5'end-2 | CGAGTGACTTGAAGTGTCACTC    | 1-281                                            |
|         | RNA1-F1       | CCAATCTCTCTCGTAATGGATC    | 18-866<br>(849)                                  |
|         | RNA1-R1       | CCTCTCAATTCGGTAAGCCTT     |                                                  |
|         | RNA1-F2       | GGTATGAGCACAAGTTTCTGT     | 778-1697<br>(920)                                |
|         | RNA1-R2       | GGTTAGTTTCTCGTCTTTCAGC    |                                                  |
|         | RNA1-F3       | GTGGTTCTGGAACTACCTGG      | 1554-2968<br>(1415)                              |
|         | RNA1-R3       | GGGTCCTTACCACTGTATATGT    |                                                  |
|         | 1Race-3'end-1 | CGAATGTTGCACTGGTCCGTA     | 2908-3299<br>(392)                               |
|         | 1Race-3'end-2 | CGTACCTGCACACTGATCATAAG   | 3115-3299<br>(185)                               |
|         |               |                           |                                                  |
|         | 2Race-5'end-1 | CGAACAAGACCTTAGTGGCCG     | 1-59                                             |
|         | 2Race-5'end-2 | GGTCTAAGGAAAACCTACTAACCT  | 1-186                                            |
|         | RNA2-F1       | CCATCACGATTTGAGAGAATTCC   | 64-939<br>(876)                                  |
|         | RNA2-R1       | CGTTTCGACTAACTCCTGGAA     |                                                  |
|         | RNA2-F2       | CCAACAACATCCGACATACTCA    | 808-1612<br>(805)                                |
|         | RNA2-R2       | GATGTAACCTCTGTTGAGACTTG   |                                                  |
|         | RNA2-F3       | GAGAGAGCATTACCAGCTACTA    | 1378-2605<br>(1228)                              |
|         | RNA2-R3       | CTCTATATCCACACGGTGGAG     |                                                  |
|         | 2Race-3'end-1 | CGAGTGATTTCGTCGTATGGAGTGG | 2342-2675<br>(334)                               |
|         | 2Race-3'end-2 | CGAAAAGCAGAATGTGTTGAAC    | 2400-2675<br>(276)                               |
|         |               |                           |                                                  |
|         | 3Race-5'end-1 | GATCTGGACCAGGAGAAGTAGT    | 1-159                                            |
|         | 3Race-5'end-2 | CGACCTACATCTCTATAGATCT    | 1-358                                            |
|         | RNA3-F1       | GGAAGAGCTTCAGCAAGTCAC     | 152-1118<br>(967)                                |
|         | RNA3-R1       | CTTGAGCTCCAGTCGGATGAC     |                                                  |
|         | RNA3-F2       | GGTTAGAAGCAGGATTGCGTC     | 722-1688<br>(967)                                |
|         | RNA3-R2       | CCTAGACCTCCAACAAGTCTTC    |                                                  |
|         | 3Race-3'end-1 | CGATTTGCACGAGAGTGCAGA     | 1526-1802<br>(277)                               |
|         | 3Race-3'end-2 | CGTAGTAACGACTGAGTTACCACG  | 1609-1802<br>(194)                               |
|         | Detection_F   | GGTTAGAAGCAGGATTGCGTC     | 722-1118<br>(397)                                |
|         | Detection_R   | CTTGAGCTCCAGTCGGATGAC     |                                                  |
|         |               |                           |                                                  |

|         |             |                          |                     |
|---------|-------------|--------------------------|---------------------|
| BabRV-1 | Race-5'     | CCCATCAGCTGAAGGAATTGC    | 1-251               |
|         | F1          | GACTCTATGCCTACTGTGGTAC   | 80-1152             |
|         | R1          | CGACACTGAGATCAACAAAGTAG  | (1073)              |
|         | F2          | GCAACTGTTCATGACAATCCCA   | 1056-2062           |
|         | R2          | GGTGCCTATCTCTCAGTTTCC    | (1007)              |
|         | F3          | CTATCAGTGCCTGAGCTGAACT   | 1962-2991           |
|         | R3          | GCAATTGCAATAGGAAGGACT    | (1030)              |
|         | F4          | CCTCAAAGATGTCTAAACCTCT   | 2907-3850           |
|         | R4          | GTAGGTAGGATTAAGGCTGTAG   | (944)               |
|         | F5          | GAGCATCGAGGAACACCCTCA    | 3793-4670           |
|         | R5          | GATCGGATCCTTCTGATTTTCTC  | (878)               |
|         | F6          | CCAGACTGAACATCATGGTCT    | 4563-5511           |
|         | R6          | GACCAAACATCTGTGTCCATGG   | (949)               |
|         | F7          | GACATGCTTGACCTATGTCTCA   | 5305-6233           |
|         | R7          | CTGAGTGATCACAACCTCATCTG  | (929)               |
|         | F8          | GCAGATTGGGTTTCATCAGATGT  | 6153-7059           |
|         | R8          | CCATATCTCCAACAGTCTGTCT   | (907)               |
|         | F9          | CCACGATGGAAGACTGGAAG     | 6862-7930           |
|         | R9          | CCATCTATATCTATGATCGGATG  | (1069)              |
|         | F10         | GAGATGATATATCAGAGACAGGC  | 7795-8790           |
|         | R10         | GGAGGTCGTGAGTGATGTCAAA   | (996)               |
|         | F11         | GAAGTGGAATCAGCAAATGAGG   | 8687-9719           |
|         | R11         | GAATGACATTCCCATCAGTTGTC  | (1033)              |
|         | F12         | GAGAGCTACATATGATCAATCCC  | 9655-10570          |
|         | R12         | CGATGATCATAGCTACCTCTGA   | (916)               |
|         | F13         | CACAAACATTGATCCCTCACAAAC | 10505-11437         |
|         | R13         | CCAAGACAATCTAAACAAGAGAG  | (933)               |
|         | F14         | GCAGATTGTCCTTCATGTTATAG  | 11375-12359         |
|         | R14         | CTCAATCTTCTCCAGTATTCTCT  | (985)               |
|         | F15         | CCAGATACAAGTTCTTGAATAGG  | 12292-12765         |
|         | R15         | GGTGGTGATAGGGATTAAGTCC   | (474)               |
|         | Race 3'     | CCTAGACTGGTTCGCTTCTGAT   | 12712-12802<br>(91) |
|         | Detection_F | GGAGTCGGCATTGGTATAGCA    | 1347-2269           |
|         | Detection_R | CCGTTGTCCTTTAACACCCTAG   | (923)               |

\* For babaco rhabdovirus-1 the primer positions correspond to the complementary (positive-sense) genome.
