# Supplementary material for: The Virome of Babaco (Vasconcellea × heilbornii) Expands to Include New Members of the Rhabdoviridae and Bromoviridae
Source: MDPI journal article supplement (doi:10.3390/v15061380), 2023-06-16
Supplement: s1 [file s1]

**Supplementary Table S1.** Primer information for detection of babaco viruses.

| Virus                            | Primer information (5' – 3') |                         |                          |                       | Reference                  |
|----------------------------------|------------------------------|-------------------------|--------------------------|-----------------------|----------------------------|
|                                  | Forward                      | Reverse                 | Annealing temperature °C | Amplification product |                            |
| Papaya ringspot virus            | GAGARGTAYATGCCGCGGTATGG      | CGCATACCCAGGAGAGAGTGC   | 55                       | 263                   | Quito-Avila et al. 2015    |
| Babaco mosaic virus              | GGATGCACTCATTACATCCAAGC      | CCACTCCAAGGCTTCCATGAGC  | 57                       | 647                   | Alvarez-Quinto et al. 2017 |
| Babaco virus Q                   | CGTGTGCTTGCTGGTTTTTCGTTT     | CAACGGGAAACCCATACACCTGG | 55 - 57                  | 1055                  | Cornejo-Franco et al. 2020 |
| Babaco cheravirus-1              | GCTTGTCATTAGCACGGCTAAC       | GCAGGAAAGAGCGTCTGATCA   | 55 - 57                  | 447                   | Cornejo-Franco et al. 2020 |
| Babaco nepovirus -1              | GGTATGCTCGACAGAGCATTGT       | CCCTTCTACATTCCACAACCAC  | 55 - 57                  | 269                   | Cornejo-Franco et al. 2020 |
| Babaco cryptic virus-1           | GGACTAGTACACCCTACCAACG       | CCATAGGGTACCATGCACAAAC  | 55 - 57                  | 469                   | Cornejo-Franco et al. 2020 |
| Babaco endogenous pararetrovirus | CACCCTTGGCGAATATATGCAG       | TGCTCAACATGTCCTGAAGC    | 55 - 57                  | 407                   | Cornejo-Franco et al. 2020 |
